# Supplementary material for: Loss of RXFP2 and INSL3 genes in Afrotheria shows that testicular descent is the ancestral condition in placental mammals
Source: PLOS journal article supplement (doi:10.1371/journal.pbio.2005293), 2018-06-28

**A**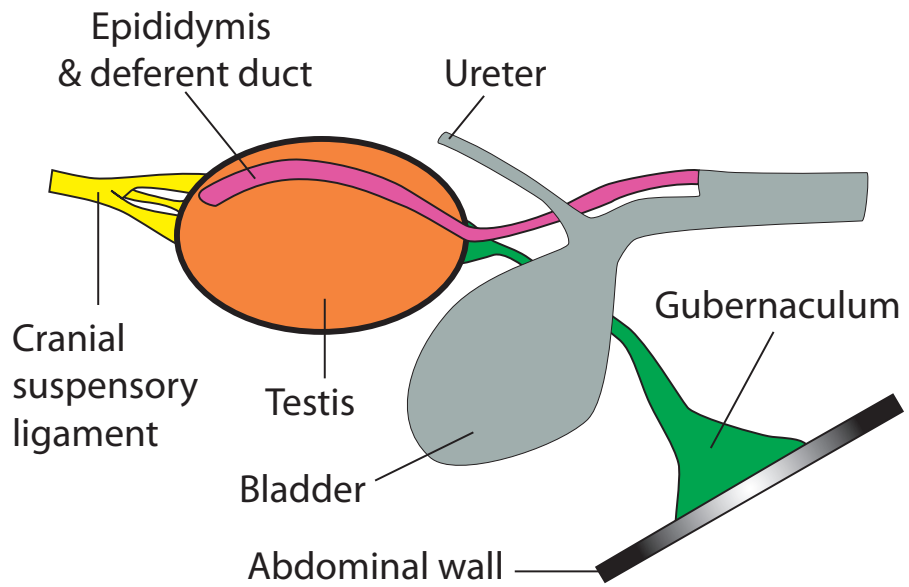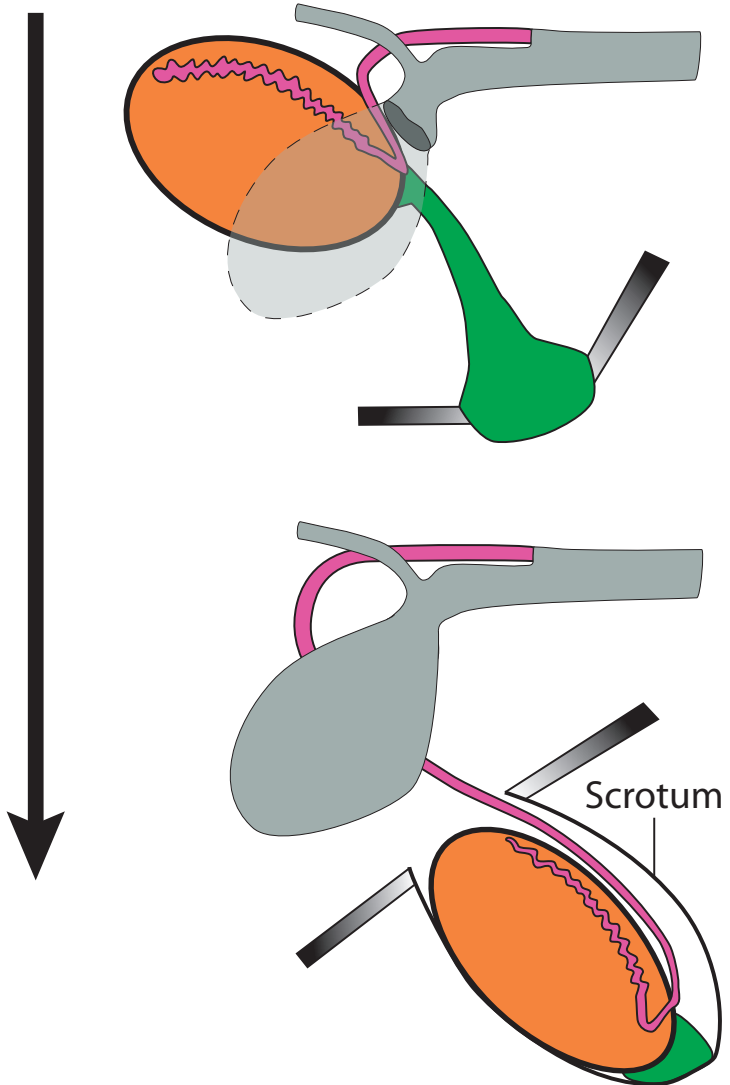**B**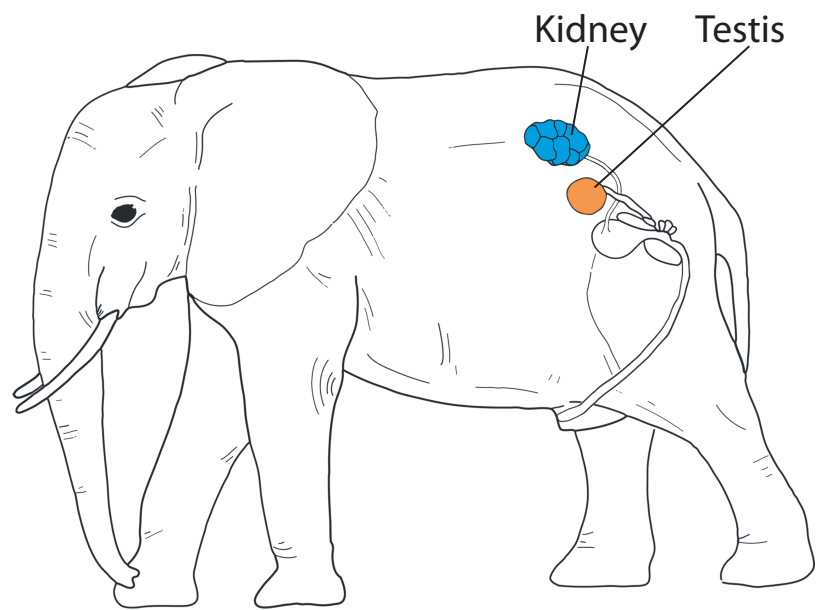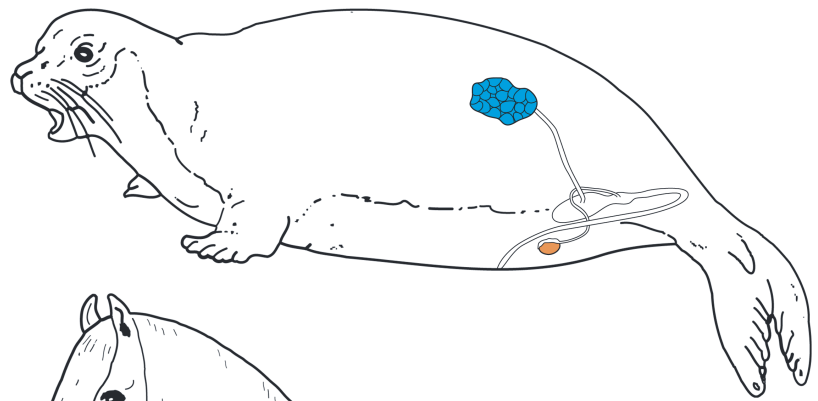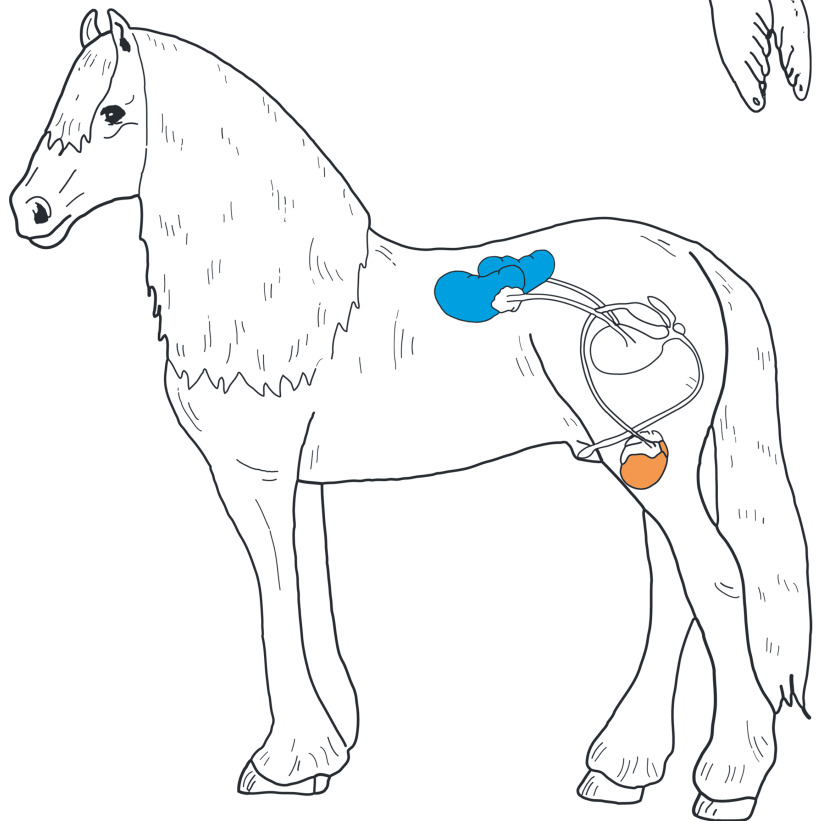

Supplement: S1 (10.1371/journal.pbio.2005293.s001) [file journal.pbio.2005293.s001.pdf]
