# Supplementary material for: Loss of RXFP2 and INSL3 genes in Afrotheria shows that testicular descent is the ancestral condition in placental mammals
Source: PLoS Biol. 2018 Jun 28;16(6):e2005293. doi: 10.1371/journal.pbio.2005293 (PMC6023123; doi:10.1371/journal.pbio.2005293)
Supplement: S1 Table — We used RELAX [52] to test individually for each mammal if RXFP2 evolves under relaxed or intensified selection. Red: species for which relaxed selection at a raw P value < 0.05 was found. Blue: species for which an intensification of selection at a raw P value < 0.05 was detected. Bold: species with a significant P value after correcting for multiple testing using the Benjamini and Hochberg method. Species are sorted by the raw P value. We also applied RELAX to test for relaxed selection in all individual Afrotheria using only non-Afrotherian species as reference. These tests confirm that cape elephant shrews, tenrecs, cape golden moles, and manatees (but no other Afrotheria) have significant evidence for relaxed selection with very similar raw P values of 1.4E-13, 4.4E-13, 7.3E-10, and 1.9E-07, respectively. RXFP2, relaxin/insulin-like family peptide receptor 2. (XLSX) [file pbio.2005293.s013.xlsx]

## Sheet: Sheet
Species/Assembly	P-value	Adjusted P-value		Species/Assembly	P-value	Adjusted P-value
Cape elephant shrew(eleEdw1)	2.52816e-10	1.17192e-08		Human(hg38)	0.614552	1
Tenrec(echTel2)	3.34834e-10	1.17192e-08		Hoffmans two-fingered sloth(choHof2)	0.623502	1
Cape golden mole(chrAsi1)	1.12475e-06	2.62442e-05		Pacific walrus(odoRosDiv1)	0.630122	1
Manatee(triMan1)	1.82894e-06	3.20064e-05		Black flying-fox(pteAle1)	0.64848	1
Squirrel(speTri2)	0.000360847	0.00505186		Horse(equCab2)	0.653159	1
Ferret(musFur1)	0.00865317	0.100954		Pig(susScr3)	0.669315	1
Chinese hamster(criGri1)	0.0298173	0.298173		Green monkey(chlSab2)	0.673391	1
Sperm whale(phyCat1)	0.0343417	0.300415		Microbat(myoLuc2)	0.681492	1
Cape rock hyrax(proCap2)	0.0386248	0.300415		Panda(ailMel1)	0.702667	1
Marmoset(calJac3)	0.0481567	0.337097		Sheep(oviAri3)	0.715798	1
Dog(canFam3)	0.0645744	0.410928		Elephant(loxAfr3)	0.727603	1
Lesser Egyptian jerboa(jacJac1)	0.0807153	0.470839		Bison(bisBis1)	0.735351	1
Mouse(mm10)	0.138205	0.710063		Killer whale(orcOrc1)	0.736016	1
Big brown bat(eptFus1)	0.144343	0.710063		Baboon(papAnu2)	0.745818	1
Bushbaby(otoGar3)	0.152156	0.710063		Megabat(pteVam1)	0.751798	1
Cat(felCat8)	0.183271	0.758091		Armadillo(dasNov3)	0.772682	1
Weddell seal(lepWed1)	0.189299	0.758091		Tibetan antelope(panHod1)	0.783896	1
Alpaca(vicPac2)	0.194938	0.758091		Blind mole rat(nanGal1)	0.787585	1
Chinese tree shrew(tupChi1)	0.250333	0.922281		Tarsier(tarSyr2)	0.795768	1
Rat(rn6)	0.283114	0.9909		Naked mole-rat(hetGla2)	0.820288	1
Dolphin(turTru2)	0.316478	0.999646		Polar bear(ursMar1)	0.823593	1
Guinea pig(cavPor3)	0.324045	0.999646		Rhesus(rheMac3)	0.864613	1
Brush-tailed rat(octDeg1)	0.328455	0.999646		David's myotis bat(myoDav1)	0.873597	1
White rhinoceros(cerSim1)	0.364353	1		Bactrian camel(camFer1)	0.899449	1
Gibbon(nomLeu3)	0.391228	1		Golden snub-nosed monkey(rhiRox1)	0.905024	1
Chimp(panTro4)	0.40747	1		Gorilla(gorGor3)	0.918798	1
Bonobo(panPan1)	0.412356	1		Minke whale(balAcu1)	0.93053	1
Cow(bosTau8)	0.421316	1		Domestic goat(capHir1)	0.956411	1
Orangutan(ponAbe2)	0.492909	1		Chinchilla(chiLan1)	0.96083	1
Mouse lemur(micMur2)	0.502965	1		Hedgehog(eriEur2)	0.9718	1
Rabbit(oryCun2)	0.517788	1		Prairie deer mouse(perManBai1)	1	1
Squirrel monkey(saiBol1)	0.534219	1		Aardvark(oryAfe1)	1	1
Pika(ochPri3)	0.541998	1		Crab-eating macaque(macFas5)	1	1
Prairie vole(micOch1)	0.55601	1		Shrew(sorAra2)	1	1
Star nosed mole(conCri1)	0.578163	1		Golden hamster(mesAur1)	1	1
