# Supplementary material for: Loss of RXFP2 and INSL3 genes in Afrotheria shows that testicular descent is the ancestral condition in placental mammals
Source: PLoS Biol. 2018 Jun 28;16(6):e2005293. doi: 10.1371/journal.pbio.2005293 (PMC6023123; doi:10.1371/journal.pbio.2005293)
Supplement: S4 Table — We added the estimates from [32]. (XLSX) [file pbio.2005293.s016.xlsx]

## Sheet: Sheet
Estimated divergence time	Reference
Macroscelidae (cape elephant shrew)
63	Mitogenomic analyses of eutherian relationships, Arnason et al. 2002
64.7	Phylogenomic datasets provide both precision and accuracy in estimating the timescale of placental mammal phylogeny, dos Reis et al. 2012
68	Molecular estimation of eulipotyphlan divergence times and the evolution of Insectivora, Douady et al. 2003
73	Using genomic data to unravel the root of the placental mammal phylogeny, Murphy et al. 2007
73.1	Robust time estimation reconciles views of the antiquity of placental mammals, Kitazoe et al. 2007
75.8	Impacts of the Cretaceous Terrestrial Revolution and KPg extinction on mammal diversification, Meredith et al. 2011
77.5	Recapitulating the evolution of Afrotheria: 57 genes and rare genomic changes (RGCs) consolidate their history, Poulakakis and Stamatakis, 2010
87.5	Geographical variation in predictors of mammalian extinction risk: big is bad, but only in the tropics, Fritz et al. 2009
91.2	The delayed rise of present-day mammals, Bininda-Emonds et al. 2007
Chrysochloridae (cape golden mole) and Tenrecidae (tenrec)
61.3	Recapitulating the evolution of Afrotheria: 57 genes and rare genomic changes (RGCs) consolidate their history, Poulakakis and Stamatakis, 2010
63	Molecular estimation of eulipotyphlan divergence times and the evolution of Insectivora, Douady et al. 2003
63.9	Impacts of the Cretaceous Terrestrial Revolution and KPg extinction on mammal diversification, Meredith et al. 2011
64	Placental mammal diversification and the Cretaceous-Tertiary boundary, Springer et al. 2003
64.7	Phylogenomic datasets provide both precision and accuracy in estimating the timescale of placental mammal phylogeny, dos Reis et al. 2012
65.4	Using genomic data to unravel the root of the placental mammal phylogeny, Murphy et al. 2007
69	Molecular phylogeny and divergence times of Malagasy tenrecs: influence of data partitioning and taxon sampling on dating analyses, Poux et al. 2008
73.1	Robust time estimation reconciles views of the antiquity of placental mammals, Kitazoe et al. 2007
81.7	Geographical variation in predictors of mammalian extinction risk: big is bad, but only in the tropics, Fritz et al. 2009
85.2	The delayed rise of present-day mammals, Bininda-Emonds et al. 2007
Sirenia (manatee)
42.3	Primate phylogeny, evolutionary rate variations, and divergence times: a contribution from the nuclear gene IRBP, Poux et al. 2004
59.1	Arrival and diversification of caviomorph rodents and platyrrhine primates in South America, Poux et al. 2006
60	The evolution of armadillos, anteaters and sloths depicted by nuclear and mitochondrial phylogenies: implications for the status of the enigmatic fossil Eurotamandua, Delsuc et al. 2001
60.3	Phylogenomic datasets provide both precision and accuracy in estimating the timescale of placental mammal phylogeny, dos Reis et al. 2012
60.9	Asynchronous colonization of Madagascar by the four endemic clades of primates, tenrecs, carnivores, and rodents as inferred from nuclear genes, Poux et al. 2005
62	Placental mammal diversification and the Cretaceous-Tertiary boundary, Springer et al. 2003
64.2	Using genomic data to unravel the root of the placental mammal phylogeny, Murphy et al. 2007
64.4	Impacts of the Cretaceous Terrestrial Revolution and KPg extinction on mammal diversification, Meredith et al. 2011
64.8	Robust time estimation reconciles views of the antiquity of placental mammals, Kitazoe et al. 2007
65	Mammalian evolution may not be strictly bifurcating, Hallstroem et al. 2010
65	Molecular estimation of eulipotyphlan divergence times and the evolution of Insectivora, Douady et al. 2003
67.7	Recapitulating the evolution of Afrotheria: 57 genes and rare genomic changes (RGCs) consolidate their history, Poulakakis and Stamatakis, 2010
69	Influence of Tertiary paleoenvironmental changes on the diversification of South American mammals: a relaxed molecular clock study within xenarthrans, Delsuc et al. 2004
70	Mitogenomic analyses of eutherian relationships, Arnason et al. 2002
75.8	Geographical variation in predictors of mammalian extinction risk: big is bad, but only in the tropics, Fritz et al. 2009
77.8	The delayed rise of present-day mammals, Bininda-Emonds et al. 2007
78	Mitogenomic relationships of placental mammals and molecular estimates of their divergences, Arnason et al. 2008
88.8	Vertebrate time-tree elucidates the biogeographic pattern of a major biotic change around the K-T boundary in Madagascar, Crottini et al. 2012
